# Supplementary material
Source: PubMed Central journal article supplement (PMC3135932)
Supplement: supp_pp.111.177766_177766Supplemental_material_2011_04_08.pdf [file supp_pp.111.177766_177766Supplemental_material_2011_04_08.pdf]

## SUPPLEMENTAL MATERIAL

**Table S1.** Set of transcripts down- and up-regulated in Arabidopsis cell cultures under 30 min of HL stress (adjusted p-value < 0.05). (.xls)

**Table S2.** GO Biological process terms significantly over-represented in the list of 403 up-regulated transcripts in ACSC under HL stress. (.pdf)

**Table S3.** Transcription factors up-regulated in ACSC under HL stress. (.pdf)

**Table S4.** List of transcripts up- and down-regulated in ACSC under HL together with their resulting co-regulated transcripts when compared to key selected Arabidopsis plants (xls)

**Table S5.** Pearson's correlation between different treatments. (.pdf)

**Table S6.** Transcripts and their corresponding primers designed for both monitoring ROS-mediated responses in ACSC under HL stress (first four rows) and RT-PCR validation of DNA microarray experiments. (.pdf)

**Figure S1.** Oxygen evolution rates of ACSC after the HL treatment. LL, control ACSC; HL, ACSC exposes to HL ( $1,800 \mu\text{E m}^{-2} \text{s}^{-1}$ ) for 30 min in the glass vessel and oxygen evolution measured at  $300 \mu\text{E m}^{-2} \text{s}^{-1}$  in the oxygen electrode chamber after the treatment; and HL\*, ACSC exposes to HL for 30 min and oxygen evolution measured at  $1,800 \mu\text{E m}^{-2} \text{s}^{-1}$  in the oxygen electrode chamber after the treatment. (.pdf)

**Figure S2.** PCA plot of the microarray experiments: ACSC under control ( $50 \mu\text{E m}^{-2} \text{s}^{-1}$ ), 1-h dark and HL ( $1,800 \mu\text{E m}^{-2} \text{s}^{-1}$ ) conditions. (.pdf)

**Figure S3.** FatiScan over-represented biological processes in ACSC under HL stress. (.pdf)

**Figure S4.** Validation of the microarray experiments in ACSC under HL stress by RT-PCR. Selected transcripts showed statistically significant changes in expression under the assayed

experimental conditions (adjusted  $p$ -value < 0.05), except the transcripts 2-OXO (At4g10500) and DEF (At2g43510) that did not show significant changes in expression. (.pdf)

**Figure S5.** Venn Diagrams representing the number of up-regulated transcripts in ACSC at HL that are co-regulated in the  $^1\text{O}_2$  producing mutants *flu* and *flu/over-tAPX* (panel A) and the (apo)carotenoids deficient mutants *aba1* and *max4* (panel B). (.pdf)

**Table S2.** *GO Biological process terms significantly over-represented in the list of 403 up-regulated transcripts in ACSC under HL stress.*

| <b>Accession code</b> | <b>Description</b>                             | <b>Adj. <i>p</i>-value</b> |
|-----------------------|------------------------------------------------|----------------------------|
| GO:0010200            | Response to chitin                             | 4.565E-12                  |
| GO:0009743            | Response to carbohydrate stimulus              | 8.727E-10                  |
| GO:0010033            | Response to organic substance                  | 1.876E-09                  |
| GO:0009723            | Response to ethylene stimulus                  | 2.717E-05                  |
| GO:0006970            | Response to osmotic stress                     | 4.517E-04                  |
| GO:0009414            | Response to water deprivation                  | 4.809E-04                  |
| GO:0009628            | Response to abiotic stimulus                   | 4.809E-04                  |
| GO:0009751            | Response to salicylic acid stimulus            | 4.809E-04                  |
| GO:0009651            | Response to salt stress                        | 5.463E-04                  |
| GO:0009415            | Response to water                              | 5.818E-04                  |
| GO:0009725            | Response to hormone stimulus                   | 1.813E-03                  |
| GO:0009753            | Response to jasmonic acid stimulus             | 2.291E-03                  |
| GO:0006355            | Regulation of transcription, DNA-dependent     | 5.427E-03                  |
| GO:0006952            | Defence response                               | 5.427E-03                  |
| GO:0051252            | Regulation of RNA metabolic process            | 5.490E-03                  |
| GO:0006351            | Transcription, DNA-dependent                   | 6.382E-03                  |
| GO:0009737            | Response to abscisic acid stimulus             | 6.382E-03                  |
| GO:0009409            | Response to cold                               | 6.739E-03                  |
| GO:0009873            | Ethylene mediated signalling pathway           | 6.739E-03                  |
| GO:0009626            | Hypersensitive response                        | 1.187E-02                  |
| GO:0034050            | Host programmed cell death induced by symbiont | 1.187E-02                  |
| GO:0009266            | Response to temperature stimulus               | 1.503E-02                  |
| GO:0009755            | Hormone-mediated signalling                    | 1.532E-02                  |
| GO:0009863            | Salicylic acid mediated signalling pathway     | 1.632E-02                  |
| GO:0000160            | Two-component signal transduction system       | 1.637E-02                  |
| GO:0009611            | Response to wounding                           | 1.917E-02                  |
| GO:0009617            | Response to bacterium                          | 1.917E-02                  |
| GO:0007242            | Intracellular signalling cascade               | 2.580E-02                  |

**Table S3.** *Transcription factors up-regulated in ACSC under HL stress.*

| <b>Array element</b> | <b>Gene ID</b> | <b>Transcription Factor (TF) Family</b>             |
|----------------------|----------------|-----------------------------------------------------|
|                      |                | <i>Redox sensitive</i>                              |
| 259992_at            | AT1G67970      | Heat shock TF A8                                    |
| 254592_at            | AT4G18880      | Heat shock TF A4A                                   |
| 248981_at            | AT5G45110      | NPR3 (NPR1-like protein 3); protein binding         |
|                      |                | <i>Zinc finger</i>                                  |
| 251950_at            | AT3G53600      | Zinc finger (C2H2 type) family protein              |
| 252567_at            | AT3G46070      | Zinc finger (C2H2 type) family protein              |
| 266010_at            | AT2G37430      | Zinc finger (C2H2 type) family protein (ZAT11)      |
| 256356_s_at          | AT1G66500      | Zinc finger (C2H2-type) family protein              |
| 245711_at            | AT5G04340      | Zinc finger (C2H2-type) 6                           |
| 265852_at            | AT2G42350      | Zinc finger (C3HC4-type RING finger) family protein |
| 265853_at            | AT2G42360      | Zinc finger (C3HC4-type RING finger) family protein |
| 247125_at            | AT5G66070      | Zinc finger (C3HC4-type RING finger) family protein |
| 252474_at            | AT3G46620      | Zinc finger (C3HC4-type RING finger) family protein |
| 246777_at            | AT5G27420      | Zinc finger (C3HC4-type RING finger) family protein |
| 245329_at            | AT4G14365      | Zinc finger (C3HC4-type RING finger) family protein |
| 256958_at            | AT3G13430      | Zinc finger (C3HC4-type RING finger) family protein |
| 247708_at            | AT5G59550      | Zinc finger (C3HC4-type RING finger) family protein |
| 257565_at            | AT3G28620      | Zinc finger (C3HC4-type RING finger) family protein |
| 256093_at            | AT1G20823      | Zinc finger (C3HC4-type RING finger) family protein |
| 251745_at            | AT3G55980      | Zinc finger (CCCH-type) family protein              |
| 254922_at            | AT4G11370      | RHA1A (RING-H2 finger A1A); zinc ion binding        |
| 254919_at            | AT4G11360      | RHA1B (RING-H2 finger A1B); zinc ion binding        |
| 262590_at            | AT1G15100      | RHA2A (RING-H2 finger A2A); zinc ion binding        |
| 258436_at            | AT3G16720      | ATL2; protein binding / zinc ion binding            |
| 259312_at            | AT3G05200      | ATL6; protein binding / zinc ion binding            |
| 252009_at            | AT3G52800      | Zinc finger (AN1-like) family protein               |
| 256185_at            | AT1G51700      | Dof zinc finger protein 1                           |
| 255381_at            | AT4G03510      | Ring finger protein with membrane anchor 1          |

|                                 |           |                                                         |
|---------------------------------|-----------|---------------------------------------------------------|
| 247655_at                       | AT5G59820 | Responsive to high light 41 / zinc ion binding          |
| 257022_at                       | AT3G19580 | Zinc-finger protein 2 / zinc ion binding                |
| 261648_at                       | AT1G27730 | Salt tolerance zinc finger / zinc ion binding           |
| 251861_at                       | AT3G54810 | Blue micropylar end 3-zinc finger                       |
| <hr/>                           |           |                                                         |
| <i>WRKY DNA-binding protein</i> |           |                                                         |
| 267246_at                       | AT2G30250 | WRKY DNA-binding protein 25                             |
| 255568_at                       | AT4G01250 | WRKY DNA-binding protein 22                             |
| 245976_at                       | AT5G13080 | WRKY DNA-Binding protein 75                             |
| 248611_at                       | AT5G49520 | WRKY DNA-binding protein 48                             |
| 249770_at                       | AT5G24110 | WRKY DNA-binding protein 30                             |
| 261892_at                       | AT1G80840 | WRKY DNA-binding protein 40                             |
| 267028_at                       | AT2G38470 | WRKY DNA-binding protein 33                             |
| 263783_at                       | AT2G46400 | WRKY DNA-binding protein 46                             |
| 254231_at                       | AT4G23810 | WRKY DNA-binding protein 53                             |
| 253485_at                       | AT4G31800 | WRKY DNA-binding protein 18                             |
| 249890_at                       | AT5G22570 | WRKY DNA-binding protein 38                             |
| <hr/>                           |           |                                                         |
| <i>RAV</i>                      |           |                                                         |
| 260037_at                       | AT1G68840 | <u>Regulator of the ATPase of the Vacuolar membrane</u> |
| <hr/>                           |           |                                                         |
| <i>MYB</i>                      |           |                                                         |
| 250858_at                       | AT5G04760 | MYB family TF                                           |
| 245084_at                       | AT2G23290 | MYB domain protein 70                                   |
| 246253_at                       | AT4G37260 | MYB domain protein 73                                   |
| 246987_at                       | AT5G67300 | MYB domain protein 44                                   |
| 260581_at                       | AT2G47190 | MYB domain protein 2                                    |
| 253067_at                       | AT4G37780 | MYB domain protein 87                                   |
| 257919_at                       | AT3G23250 | MYB domain protein 15                                   |
| 247696_at                       | AT5G59780 | MYB domain protein 59                                   |
| 257140_at                       | AT3G28910 | MYB domain protein 30                                   |
| 252193_at                       | AT3G50060 | MYB domain protein 77                                   |
| <hr/>                           |           |                                                         |
| <i>AP2</i>                      |           |                                                         |
| 255742_at                       | AT1G25560 | AP2 domain-containing TF, putative                      |
| 263194_at                       | AT1G36060 | AP2 domain-containing TF, putative                      |
| 253259_at                       | AT4G34410 | AP2 domain-containing TF, putative                      |

|                                                      |           |                                                                      |
|------------------------------------------------------|-----------|----------------------------------------------------------------------|
| 259729_at                                            | AT1G77640 | AP2 domain-containing TF, putative                                   |
| 248448_at                                            | AT5G51190 | AP2 domain-containing TF, putative                                   |
| 259793_at                                            | AT1G64380 | AP2 domain-containing TF, putative                                   |
| 256009_at                                            | AT1G19210 | AP2 domain-containing TF, putative                                   |
| 261984_at                                            | AT1G33760 | AP2 domain-containing TF, putative                                   |
| 261327_at                                            | AT1G44830 | AP2 domain-containing TF TINY, putative                              |
| 253405_at                                            | AT4G32800 | AP2 domain-containing TF TINY, putative                              |
| <hr/>                                                |           |                                                                      |
| <i>ERF</i>                                           |           |                                                                      |
| 257053_at                                            | AT3G15210 | <u>E</u> thylene <u>r</u> esponsive element binding <u>f</u> actor 4 |
| 266821_at                                            | AT2G44840 | Ethylene responsive element binding factor 13                        |
| 257927_at                                            | AT3G23240 | Ethylene responsive element binding factor 1                         |
| 245250_at                                            | AT4G17490 | Ethylene responsive element binding factor 6                         |
| 245252_at                                            | AT4G17500 | Ethylene responsive element binding factor 1                         |
| 248799_at                                            | AT5G47230 | Ethylene responsive element binding factor 5                         |
| 261470_at                                            | AT1G28370 | Ethylene responsive element binding factor 11                        |
| 252214_at                                            | AT3G50260 | ERF#011 cooperatively regulated by ethylene and jasmonate 1          |
| <hr/>                                                |           |                                                                      |
| <i>NAC</i>                                           |           |                                                                      |
| 261564_at                                            | AT1G01720 | Arabidopsis NAC domain containing protein 2                          |
| 252681_at                                            | AT3G44350 | Arabidopsis NAC domain containing protein 61                         |
| 249940_at                                            | AT5G22380 | Arabidopsis NAC domain containing protein 90                         |
| 247351_at                                            | AT5G63790 | Arabidopsis NAC domain containing protein 102                        |
| 252278_at                                            | AT3G49530 | Arabidopsis NAC domain containing protein 62                         |
| <hr/>                                                |           |                                                                      |
| <i>DREB (Dehydration-responsive element binding)</i> |           |                                                                      |
| 250781_at                                            | AT5G05410 | DREB protein 2A                                                      |
| 254075_at                                            | AT4G25470 | C-Repeat/DREB factor 2                                               |
| 255937_at                                            | AT1G12610 | DREB subfamily A-1 of ERF/AP2 TF family                              |
| 261101_at                                            | AT1G63030 | DREB subfamily A-1 of ERF/AP2 TF family                              |
| 248400_at                                            | AT5G52020 | DREB subfamily A-4 of ERF/AP2 TF family                              |
| 260856_at                                            | AT1G21910 | DREB subfamily A-5 of ERF/AP2 TF family                              |
| <hr/>                                                |           |                                                                      |

**Table S5.** Pearson's correlation between different treatments.

| <b>Mutants or hormone treatments</b> | <b>Correlation coefficient</b> | <b>p-value</b> |
|--------------------------------------|--------------------------------|----------------|
|                                      | Light vs Dark                  |                |
| <i>flu</i> vs Col-0                  | 0,334                          | 5,48E-09       |
| <i>flu/over tAPX</i> vs Col-0        | 0,360                          | 2,71E-10       |
| <i>aba1</i> vs Ler                   | 0,443                          | 2,22E-15       |
| <i>max4</i> vs Col-0                 | 0,436                          | 7,11E-15       |
| ABA vs mock                          | -0,017                         | 7,71E-01       |
| SA vs mock                           | 0,037                          | 5,35E-01       |
| Over- tAPX vs Col-0                  | -0,082                         | 1,63E-01       |
| ACC vs mock                          | 0,106                          | 7,19E-02       |
| MeJA vs mock                         | 0,080                          | 1,72E-01       |
|                                      | <i>flu</i> vs Col-0            |                |
| <i>aba1</i> vs Ler                   | 0,443                          | 2,22E-15       |
| <i>max4</i> vs Col-0                 | 0,444                          | 1,78E-15       |
|                                      | <i>aba1</i> vs Ler             |                |
| <i>max4</i> vs Col-0                 | 0,831                          | 2,20E-16       |

**Table S6.** Transcripts and their corresponding primers designed for both monitoring ROS-mediated responses in ACSC under HL stress (first four rows) and RT-PCR validation of DNA microarray experiments.

| Gene ID   | Name                                                    | Primers                                                               |
|-----------|---------------------------------------------------------|-----------------------------------------------------------------------|
| At2g19760 | Profilin (PROF)                                         | F: 5'- CCAAGGTGAACAAGGAGCTG -3'<br>R: 5'- CAAGTTGCATTGACCTCCAG -3'.   |
| At4g10500 | 2-oxoglutarate-Fe(II) oxidase (2-OXO)                   | F: 5'- TCGGTGTTCCACTTATGGTTTC -3'<br>R: 5'- ACTCTTTCGCTCTCGGGTTG -3'  |
| At2g43510 | Defensin (DEF)                                          | F: 5'- GGCTATCGTTTCCATCTTCGT -3'<br>R: 5'- CCAACATCACCTCCGTATTCTT -3' |
| At5g64870 | Nodulin2 (NOD)                                          | F: 5'- GAGGTCTTCAAAGGAACAAAGGAG -3'<br>R: 5'- CTGCTTCACATTGGCGTTG -3' |
| At5g45340 | CYP707A3; cytochrome P450, oxygen binding.              | F: 5'- TCGGCGAAACATTCCAAC-3'<br>R: 5'- TCGAGATCATCACACATGGAC-3'       |
| At4g11280 | ACS6, 1-aminocyclopropane-1-carboxylic acid synthase 6. | F: 5'- CGGCGATGGTTTCTTAGTTC-3'<br>R: 5'- AGGCTTCCACCGTAATCTTG-3'      |
| At3g25250 | AGC2, Oxidative signal-inducible1, kinase.              | F: 5'- AGGAAAATGCAATCGGAAAG-3'<br>R: 5'- TTGGATCATCACATTGTCTGG-3'     |
| At5g63790 | NAC102, NAC domain containing protein 102.              | F: 5'- CGGAGATGTGCGTCAGAAC-3'<br>R: 5'- TCCGGTCTCTATGCGAGAAG-3'       |
| At2g26190 | CAL, calmodulin-binding family protein.                 | F: 5'- GACCTTTTTCAAGTCTTCCTTGG-3'<br>R: 5'- AACACGATCTCTTCCTCCAAAC-3' |
| At1g19180 | JAZ1, Jasmonate-Zim-domain protein 1.                   | F: 5'- GCTTCTCACAGACGTGTAGTCG-3'<br>R: 5'- GACGTGAGTTGCCTAAAGTTCC-3'  |
| At1g17380 | JAZ5, Jasmonate-Zim-domain protein 5.                   | F: 5'- ATTCCAGTCTCGCGTTGC-3'<br>R: 5'- AGGTAGAGGGTTCGCCTTTG-3'        |
| At3g55980 | SZF1, Salt inducible Zinc finger family protein 1.      | F: 5'- ACCCACCACAACAATTCC-3'<br>R: 5'- TTGCTCTTTGGTCCACTGC-3'         |
| At1g66090 | TIR-NBS, disease resistance protein.                    | F: 5'- CCACGCTTTGACCTGTGTG-3'<br>R: 5'- GATCATGTTTGCCTCATCGTC-3'      |
| At1g80840 | WRKY40, WRKY DNA-binding protein 40.                    | F: 5'- TCTCACTATTGGCGTTACTCG-3'<br>R: 5'- CGAGAGCTTCTTGTTCTCAGC-3'    |



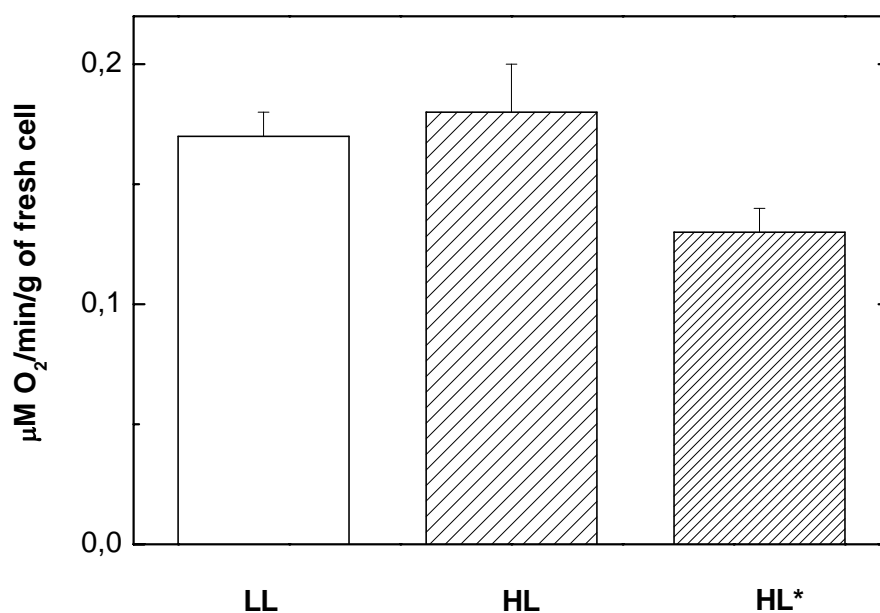

**Figure S1.** Oxygen evolution rates of ACSC after the HL treatment. LL, control ACSC; HL, ACSC exposes to HL ( $1,800 \mu\text{E m}^{-2} \text{s}^{-1}$ ) for 30 min in the glass vessel and oxygen evolution measured at  $300 \mu\text{E m}^{-2} \text{s}^{-1}$  in the oxygen electrode chamber after the treatment; and HL\*, ACSC exposes to HL for 30 min and oxygen evolution measured at  $1,800 \mu\text{E m}^{-2} \text{s}^{-1}$  in the oxygen electrode chamber after the treatment.

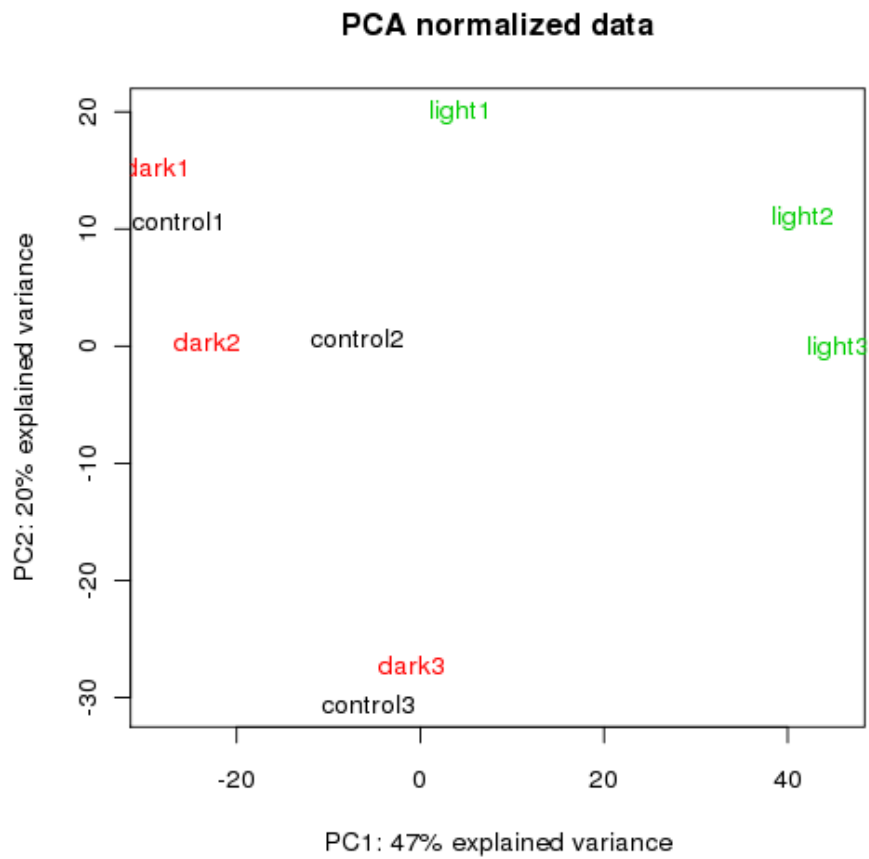

**Figure S2.** PCA plot of the microarray experiments: ACSC under control ( $50 \mu\text{E m}^{-2} \text{s}^{-1}$ ), 1-h dark and HL ( $1,800 \mu\text{E m}^{-2} \text{s}^{-1}$ ) conditions.

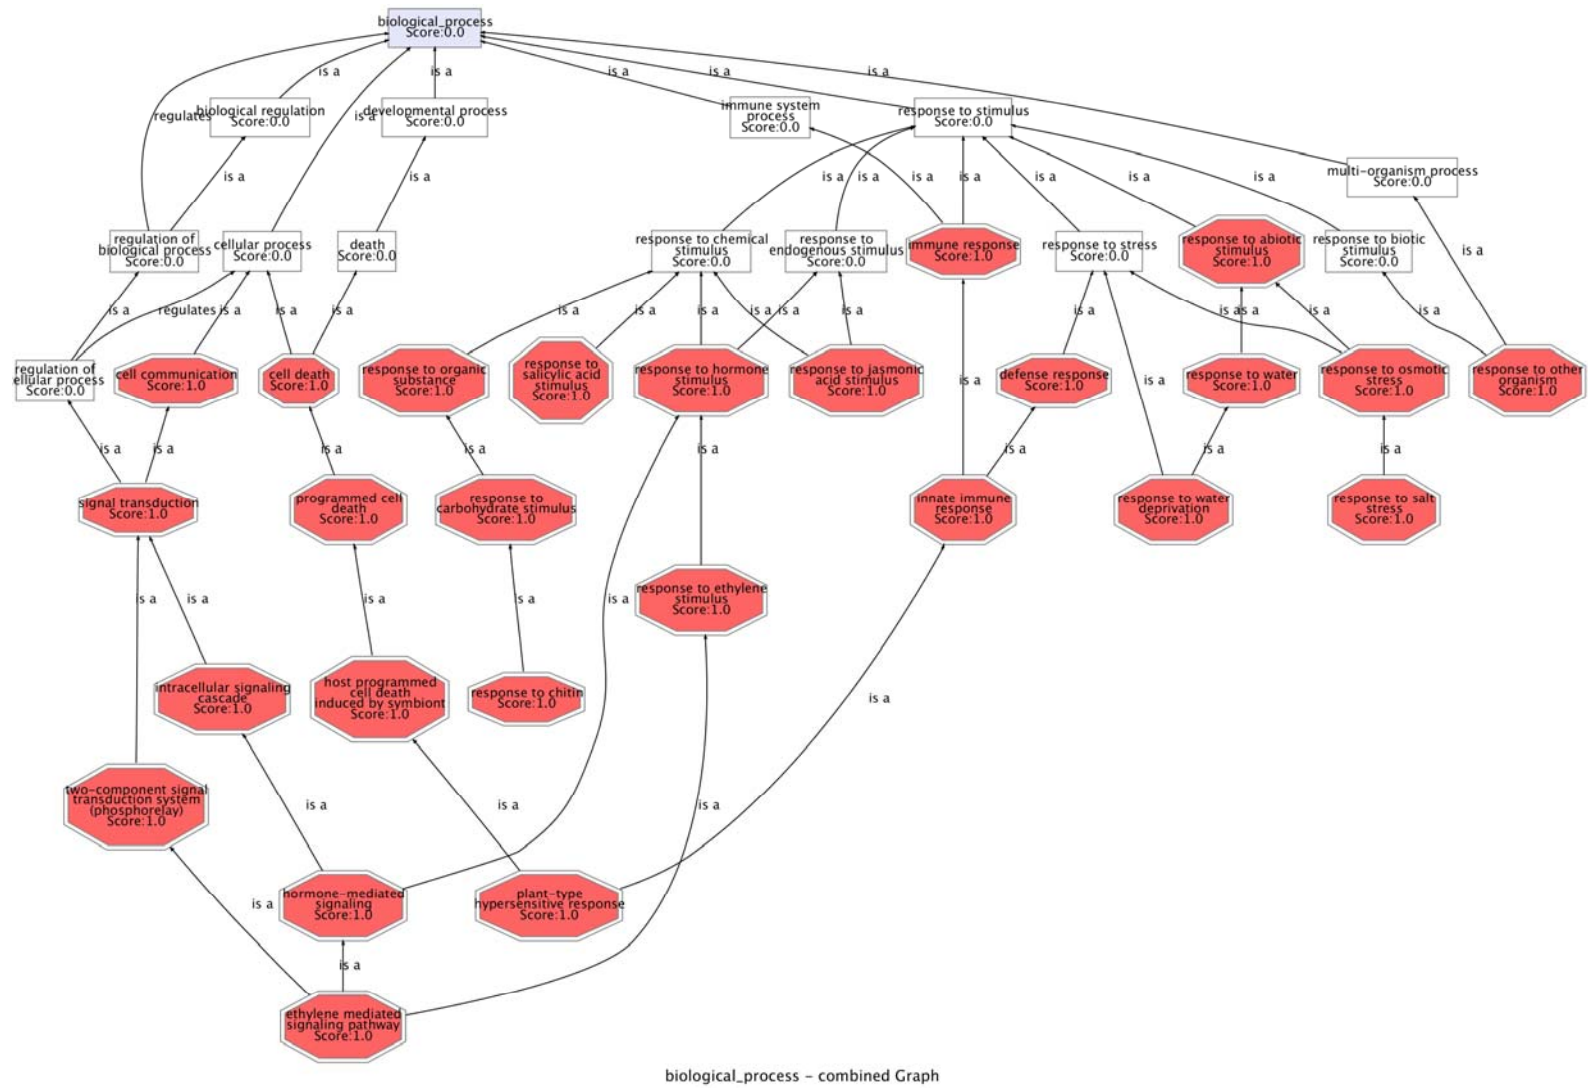

**Figure S3.** FatiScan over-represented biological processes in ACSC under HL stress.

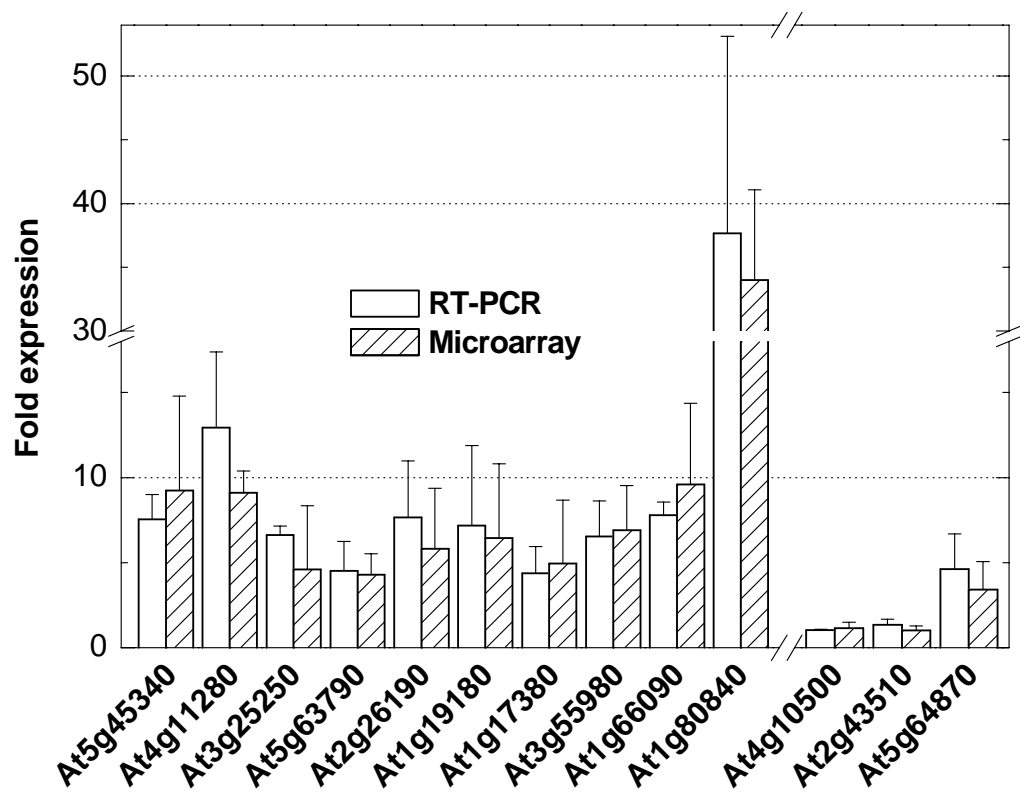

**Figure S4.** Validation of the microarray experiments in ACSC under HL stress by RT-PCR. Selected transcripts showed statistically significant changes in expression under the assayed experimental conditions (adjusted  $p$ -value < 0.05), except the transcripts 2-OXO (At4g10500) and DEF (At2g43510) that did not show significant changes in expression.

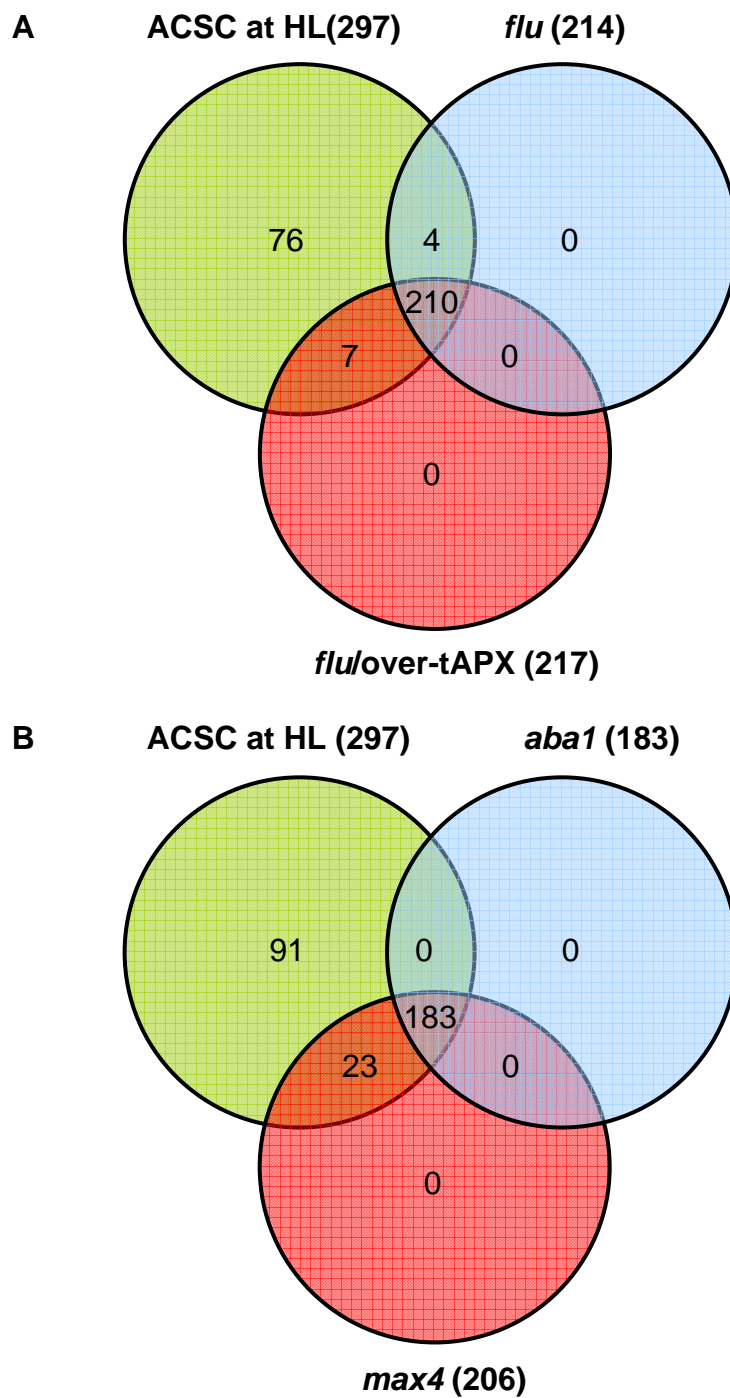

**Figure S5.** Venn Diagrams representing the number of up-regulated transcripts in ACSC at HL that are co-regulated in the  $^1\text{O}_2$  producing mutants *flu* and *flu/over-tAPX* (panel A) and the (apo)carotenoids deficient mutants *aba1* and *max4* (panel B).
